# Supplementary material for: Synthesis, photophysical and electroluminescent properties of blue-emitting dual core imidazole–anthracene/pyrene derivatives
Source: Royal Society of Chemistry journal article supplement (doi:10.1039/c6ra04958c), 2016-01-01
Supplement: c6ra04958c1.pdf [file c6ra04958c1.pdf]

### Supporting Information

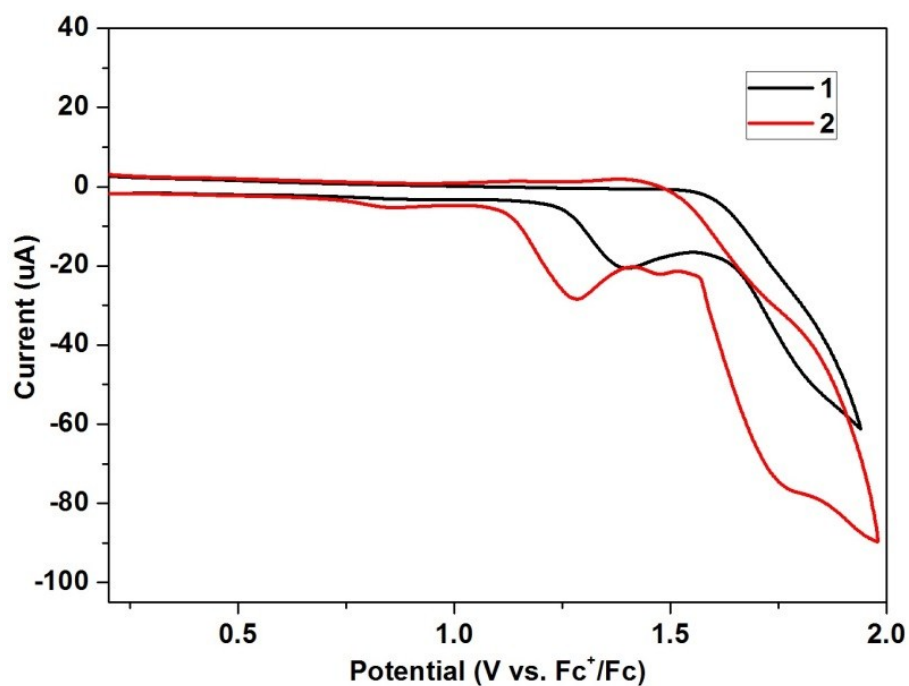

**Fig. S1** Cyclic voltammograms of compounds **1** and **2** in CH<sub>2</sub>Cl<sub>2</sub> solutions (10<sup>-3</sup> M). Potentials were recorded versus Fc<sup>+</sup>/Fc.

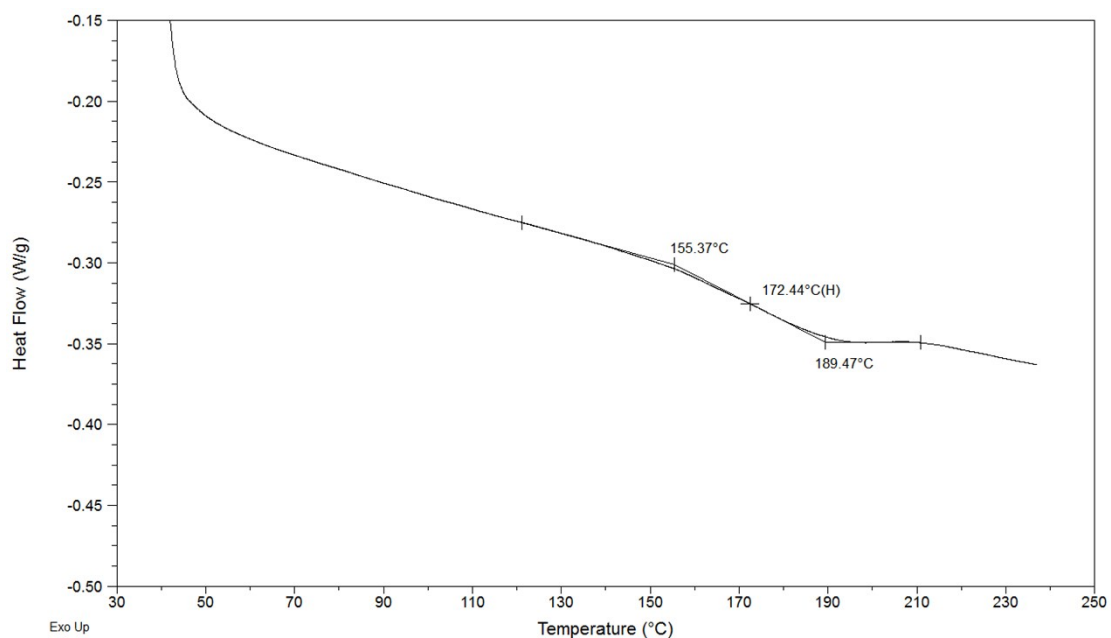

**Fig. S2** DSC thermogram of compound **1**.

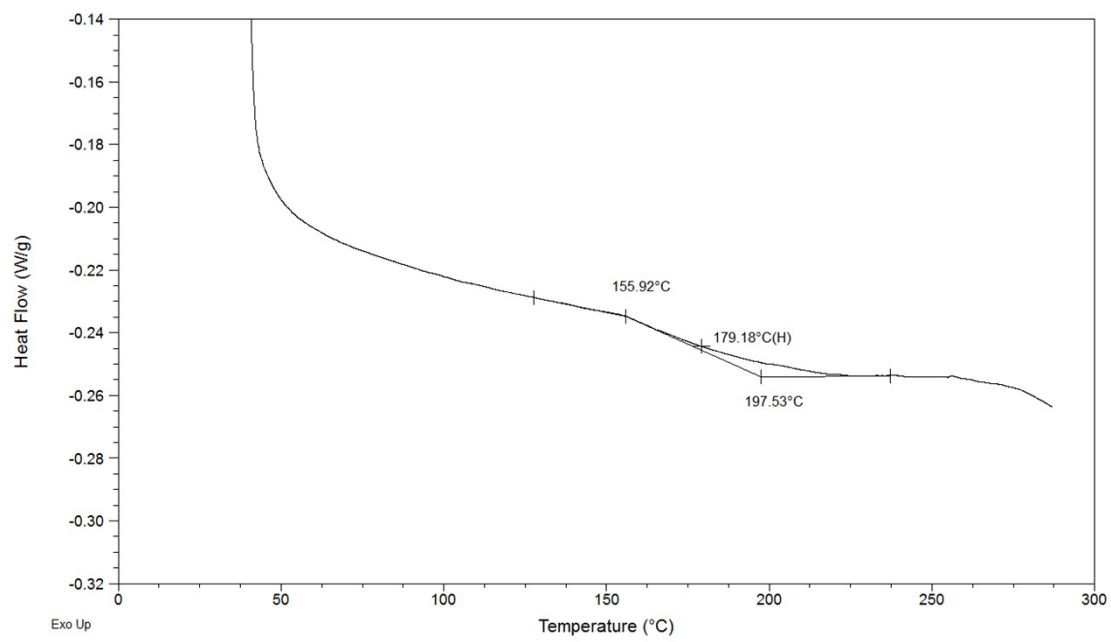

**Fig. S3** DSC thermogram of compound **2**.
